# Supplementary material for: Targeting the MTF2–MDM2 Axis Sensitizes Refractory Acute Myeloid Leukemia to Chemotherapy
Source: Oxford University Press journal article supplement (doi:10.1158/2159-8290.cd-17-0841), 2018-08-16
Supplement: 21598290cd170841-sup-186943_3_supp_4927573_pc66y6.xlsx [file 21598290cd170841-sup-186943_3_supp_4927573_pc66y6.xlsx]

## Sheet: Table S3 - Local cohort
Table S3. Clinical data of patients belonging to local cohort
Patient #	age at diagnosis	date of diagnosis	WBC at diagnosis	% bone marrow blasts at diagnosis	molecular	genetic risk group	treatment	responder	MTF2 status	H3k27me3 Status	BMT (y/n)	date of BMT	date of relapse	date of death	date of last f/u	OS	dead/alive (1/0)	cause
1	63.011	2011-12-15	114.6	69	-y, add(14)	inter	I	y	b	b	y	2014-12-22	2014-09-17	2016-03-11	2016-03-11	1548	1	other
2	60.6164	2014-04-23	18	95	del(11)	inter	I	y	b	b	y	2014-10-15	n/a	2016-07-15	2016-07-15	814	1	other
3	22.3671	2014-06-30	4.2	95	11q23	adverse	I	n	L	L	y	2014-10-02	n/a	2015-03-11	2015-03-11	254	1	leuk
4	66.1452	2012-11-05	10.8	95	del(13)	inter	I	y	b	b	y	2013-04-04	n/a	n/a	2016-11-21	1477	0	n/a
5	62.611	2011-06-13	5.3	95	-7	adverse	I	n	L	L	n	n/a	2011-11-01	2011-11-27	2011-11-27	167	1	leuk
6	28.1918	2014-05-29	113.6	70	inv(16)	fav - cbf	I	y	b	b	n	n/a	n/a	n/a	2017-03-21	1027	0	n/a
7	56.0575	2012-05-25	6.9	30	complex	adverse	I	n	L	L	n	n/a	n/a	2012-07-17	2012-07-17	53	1	leuk
8	31.8959	2012-10-15	122	80	npm	fav - npm	I	n	L	L	y	2013-05-31	2013-09-04	2013-09-14	2013-09-14	334	1	leuk
9	41.3534	2014-03-13	1.2	90	t(15;17)	fav -apl	I	y	L	L	n	n/a	n/a	n/a	2017-01-06	1030	0	n/a
10	59.5123	2012-10-23	2.6	33	normal	inter	I	y	b	L	y	2013-05-02	2013-10-03	2014-02-27	2014-02-27	492	1	leuk
11	71.0603	2013-07-16	2.4	50	normal	inter	I	y	L	L	n	n/a	2014-05-15	2015-07-15	2015-07-15	729	1	leuk
12	65.526	2012-07-06	5.7	40	complex	adverse	I	n	L	L	n	n/a	n/a	2013-02-23	2013-02-23	232	1	leuk
13	66.2411	2011-06-27	12	85	normal	inter	I	n	L	L	y	2012-02-28	n/a	2003-06-23	2013-06-23	727	1	leuk
14	50.4521	2011-09-12	15.5	90	npm	fav - npm	I	y	L	L	n	n/a	2012-09-22	2013-02-12	2013-02-12	519	1	leuk
15	58.8438	2011-11-08	1.9	85	npm	fav - npm	I	y	b	b	n	n/a	n/a	n/a	2017-03-12	1951	0	n/a
16	64.4959	2013-07-22	57	90	npm	fav - npm	I	n	L	L	n	n/a	n/a	2015-01-12	2015-01-12	539	1	leuk
17	51.0575	2012-10-25	11.5	90	npm	fav - npm	I	y	b	b	n	n/a	n/a	n/a	2017-02-22	1581	0	n/a
18	34.189	2011-05-16	9.2	70	t(6;22)	inter	I	y	b	b	y	2011-09-07	n/a	n/a	2016-02-21	1742	0	n/a
19	52.1315	2012-07-10	4.1	22	complex	adverse	I	n	L	L	y	2012-12-13	2014-07-09	2014-08-15	2014-08-15	766	1	leuk
20	67.8932	2013-12-20	3.4	26	del(12)	inter	I	n	L	L	y	2014-06-05	2014-07-06	2014-10-26	2014-10-26	310	1	leuk
21	29.4548	2013-11-21	2.1	95	-y	inter	I	y	b	b	y	2014-03-26	n/a	n/a	2016-12-19	1124	0	n/a
22	67.9726	2013-11-25	14.6	68	inv(16)	fav - cbf	I	y	b	b	n	n/a	n/a	n/a	2017-03-27	1218	0	n/a
23	42.0603	2016-03-14	81.3	95	del(5q)	adverse	I	y	L	L	y	2016-08-04	n/a	n/a	2017-03-06	357	0	n/a
24	32.8822	2015-06-16	26	90	normal	inter	i	y	L	L	y	2015-11-06	n/a	n/a	2017-03-20	643	0	n/a
25	69.8219	2016-09-26	17.5	86	add(2)	inter	i	y	L	L	n	n/a	n/a	n/a	2017-03-22	177	0	n/a
26	57.8822	2016-03-11	1.4	90	add(15)	inter	i	y	b	b	y	aug 3 2016	n/a	n/a	2017-03-13	367	0	n/a
27	53.5342	2014-07-24	0.8	63	normal	inter	i	n	L	L	n	n/a	n/a	n/a	2017-03-19	969	0	n/a
28	68.0411	2016-04-11	138.4	100	normal	inter	i	y	b	b	n	n/a	2016-09-08	2016-06-09	2016-11-14	217	1	leuk
29	63.7863	2016-04-14	88.6	92	-y	inter	i	n	b	b	n	n/a	n/a	2016-05-25	2016-05-25	41	1	other
30	56.7452	2016-04-22	1.8	29	normal	inter	i	y	b	b	n	n/a	2016-08-30	2016-09-18	2016-09-18	149	1	leuk
31	62.8712	2015-05-26	0.7	63	normal	inter	i	n	L	L	n	n/a	n/a	2016-05-25	2016-05-25	365	1	leuk
32	46.1452	2015-05-29	2.7	38	t(8;21)	fav - cbf	i	y	b	b	n	n/a	n/a	n/a	2016-11-29	550	0	n/a

## Sheet: Table S7 - Primary Transplants
Table S7. Primary Transplants
TREATMENT		MD-AML 1				MD-AML 2				MD-AML 3				MD-AML 4				B-AML 1				B-AML 1
		% PB PDX ENGRAFTMENT AT TREATMENT	BONE MARROW (%)			% PB PDX ENGRAFTMENT AT TREATMENT	BONE MARROW (%)			% PB PDX ENGRAFTMENT AT TREATMENT	BONE MARROW (%)			% PB PDX ENGRAFTMENT AT TREATMENT	BONE MARROW (%)			% PB PDX ENGRAFTMENT AT TREATMENT	BONE MARROW (%)			% PB PDX ENGRAFTMENT AT TREATMENT	BONE MARROW (%)
		CD33+CD45+	CD33+CD45+	CD34+ CD38+	CD34+CD38-	CD33+CD45+	CD33+CD45+	CD34+ CD38+	CD34+CD38-	CD33+CD45+	CD33+CD45+	CD34+ CD38+	CD34+CD38-	CD33+CD45+	CD33+CD45+	CD34+ CD38+	CD34+CD38-	CD33+CD45+	CD33+CD45+	CD34+ CD38+	CD34+CD38-	CD33+CD45+	CD33+CD45+	CD34+ CD38+	CD34+CD38-
VEHICLE CONTROL	MOUSE 1	20.5	73.4	11.8	40.1	24.6	70.2	13.5	43.7	21.28	73.14	12.76	41.01	22.08	75.02	13.6	42.11	20.3	62	12.1	32.6	20	62.7	10.2	32.3
	MOUSE 5	21.5	67.7	12.21	41.42	25.3	71.73	11.2	42.82	20.05	69.17	13.01	42.12	23.15	74.93	13.1	41.2	21.32	63.95	10.9	30.53	22.31	63.06	12.8	30.83
INDUCTION THERAPY	MOUSE 2	19.7	79.3	8.46	39	25	62.5	9.62	37.2	20.17	70.3	9.26	38.91	22.1	69.43	9.1	37.99	20	0.2	0.17	0.1	22.3	0.3	0.1	0.18
	MOUSE 6	20.32	68.43	10.2	37.1	23.1	76.33	8.32	39.3	19.02	69.03	9.32	37.33	18.71	70.23	9.21	37.45	22.25	0.33	0.15	0.2	22.11	0.25	0.2	0.12
NUTLIN 3A	MOUSE 3	20	74.7	7.57	34.2	25.1	65.7	11.1	41.8	22.31	72.37	8.15	35.21	21.01	71.27	7.01	37.52	22.3	68.5	9.01	27.9	25.1	63.2	9.4	31.7
	MOUSE 7	21.23	75.43	12.1	38.32	23.21	64.83	7.11	38.21	21.17	70.13	11.91	39.29	22.07	69.33	9.1	39.89	21.4	62.81	9.59	29.96	23.42	68.1	9.2	26.1
COMBINATION THERAPY	MOUSE 4	20.4	0.69	0.54	0.08	26.1	0	0.53	0.14	20.21	0.8	0.51	0.1	21.31	0.73	0.55	0.1	20.1	0.18	0.13	0.15	26.6	0.16	0.17	0.1
	MOUSE 8	24.21	0.79	0.53	0.05	24.3	0.49	0.52	0.12	23.21	0.75	0.52	0.13	22.11	0.82	0.52	0.12	21.45	0.67	0.17	0.07	25.34	0.18	0.13	0.12

## Sheet: Table S8- Secondary Transplants
Table S8. Secondary Transplants
		BONE MARROW (%)
PDX MICE	Mouse	CD45+CD33+	CD45+CD33-	CD34+CD38-	CD34+CD38+	CD14	CD19
MD-AML1	Mouse 1	11.4	37.7	6.31	1.94	7.95	31,10
	Mouse 2	13.6	40.2	5.95	1.85	9.2	33.93
MD-AML2	Mouse 1	15.8	33.2	5.66	1.49	9.32	29.1
	Mouse 2	13.44	41.23	6.12	1.64	10.02	29.44
MD-AML3	Mouse 1	13.22	36.81	5.92	1.72	6.9	30.21
	Mouse 2	13.45	42.34	5.68	2.4	7.2	28.04
MD-AML4	Mouse 1	13.71	36.52	5.95	1.71	7.12	32.5
	Mouse 2	13.73	35.32	6.02	2.3	8.9	30.34
